# Supplementary material
Source: HighWire-hosted journal article supplement (https://jitc.bmj.com/content/11/6/e006846)

## Supp figure 1. UHPLC/MS analyses of MC38 tumor metabolism

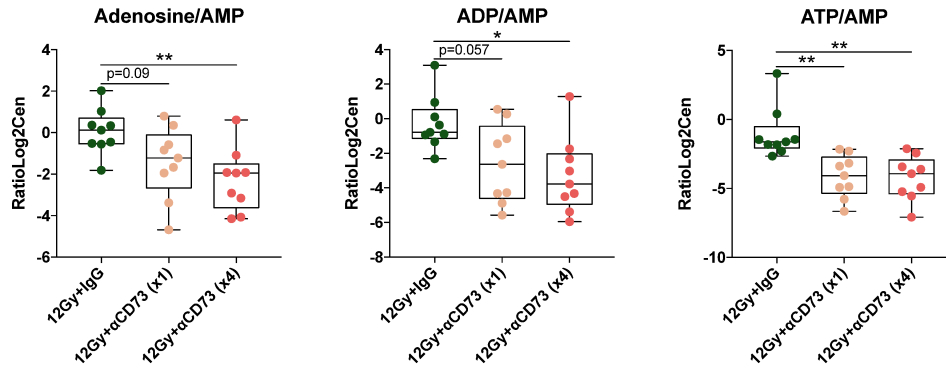

## Supp figure 2. Total number of immune cells

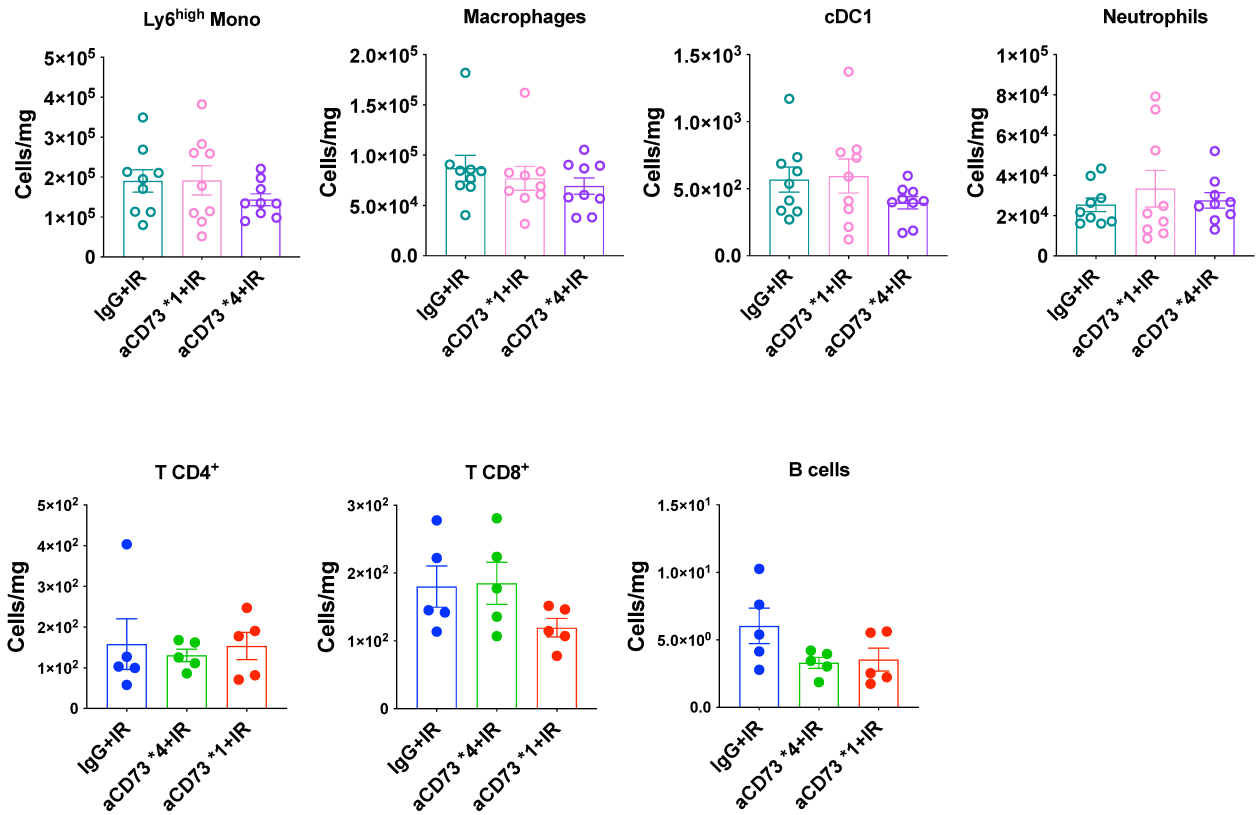

### Supp figure 3. Gating strategy for lymphoid cells infiltrating tumors analyzed by flow cytometry

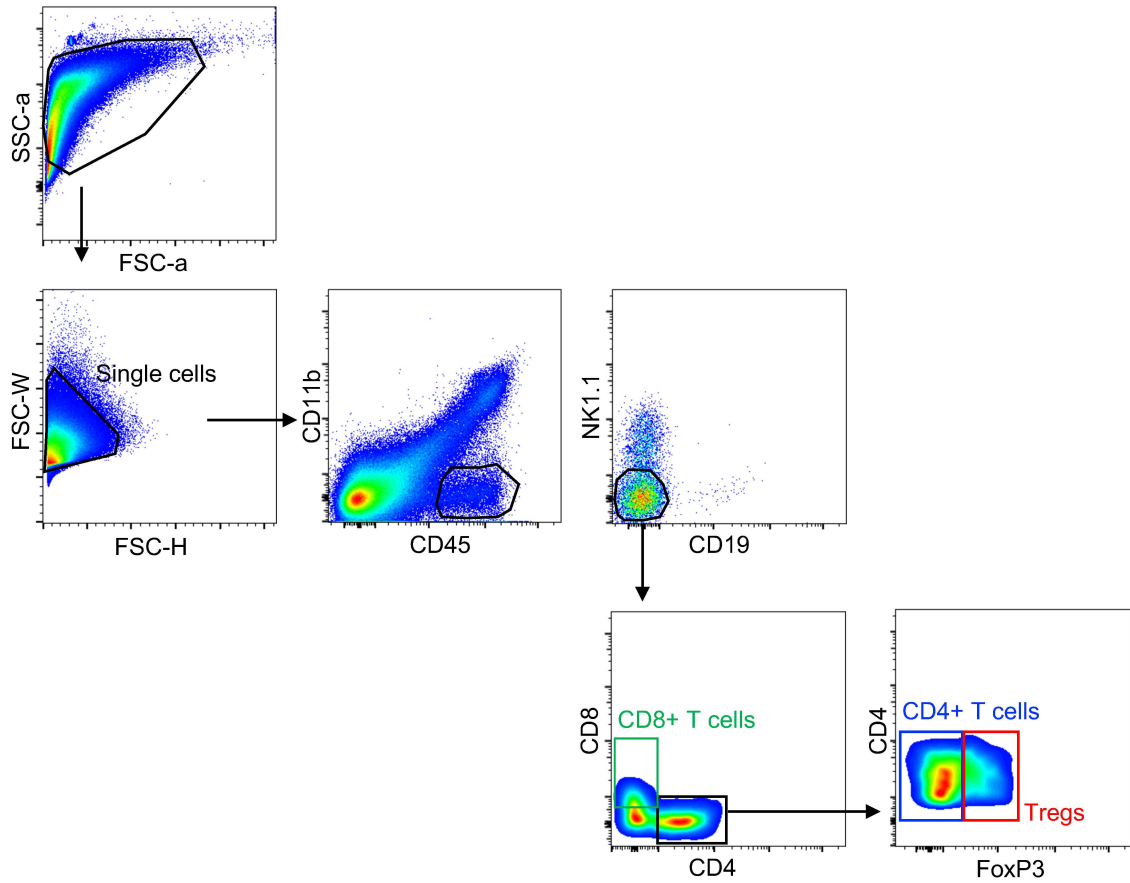

## Supp figure 4. Percent of Tregs infiltrating tumors analyzed by flow cytometry

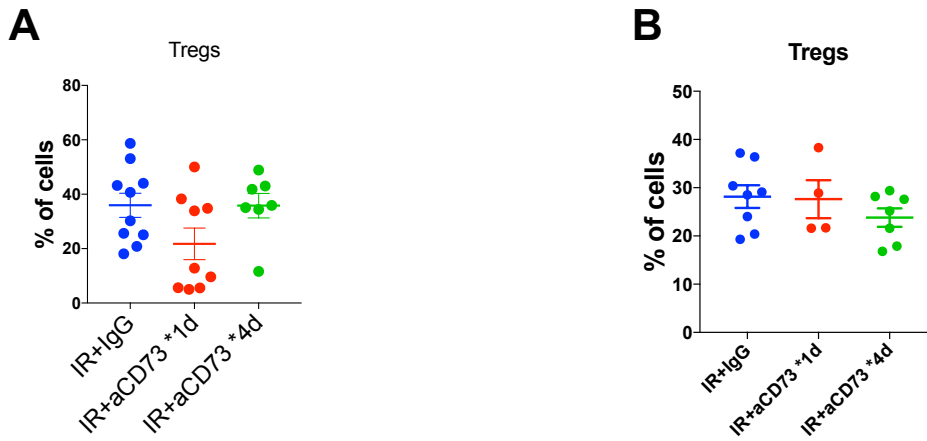

Supplement: inline-supplementary-material-1 [file inline-supplementary-material-1.pdf]
